# Supplementary material
Source: publisher site journal article supplement (https://www.spandidos-publications.com/1734/downloadSupplementary)

Figure S1. Expression of miR-532-3p in SH-SY5Y cells. +miR-532-3P mimics, cells treated with miR-532-3P mimic (50  $\mu$ M); +NC miRNA, cells with negative control miRNA (50  $\mu$ M). Data are presented as the mean  $\pm$  standard deviation. \*\*\*P<0.001 vs. control. NC, negative control; miR/miRNA, microRNA.

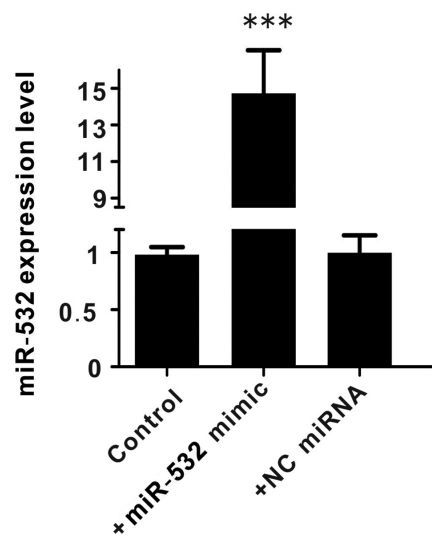

Supplement: Supplementary file 1 [file downloadSupplementary]
